# Supplementary material for: Intracellular Survival of Biofilm-Forming MRSA OJ-1 by Escaping from the Lysosome and Autophagosome in J774A Cells Cultured in Overdosed Vancomycin
Source: MDPI journal article supplement (doi:10.3390/microorganisms10020348), 2022-02-02

**Figure S1. Morphological alterations of J774A with/without OJ-1 ingestion.**

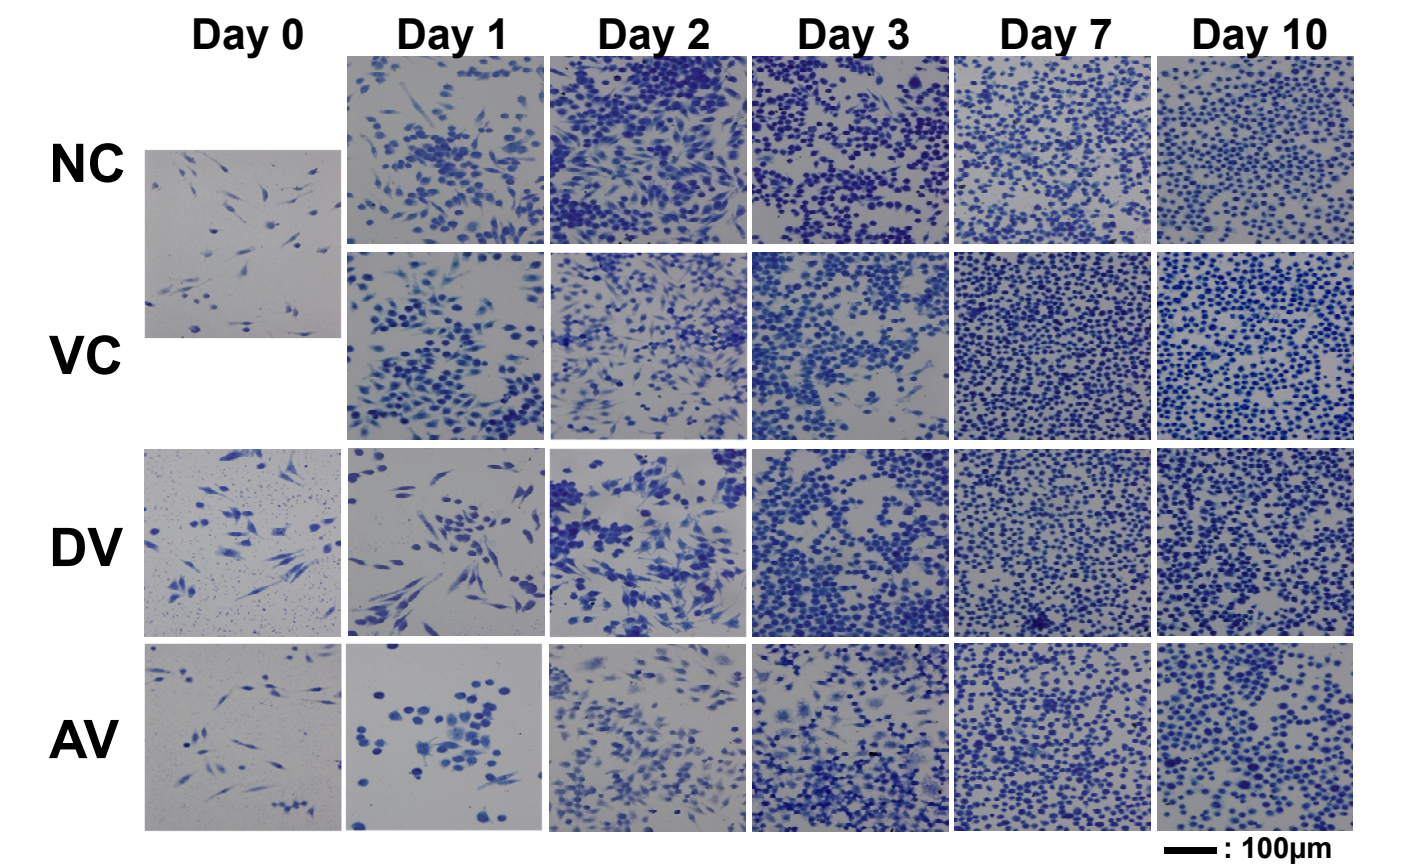

**Figure S2. Dead/Alive in J774A with/without OJ-1 ingestion.**

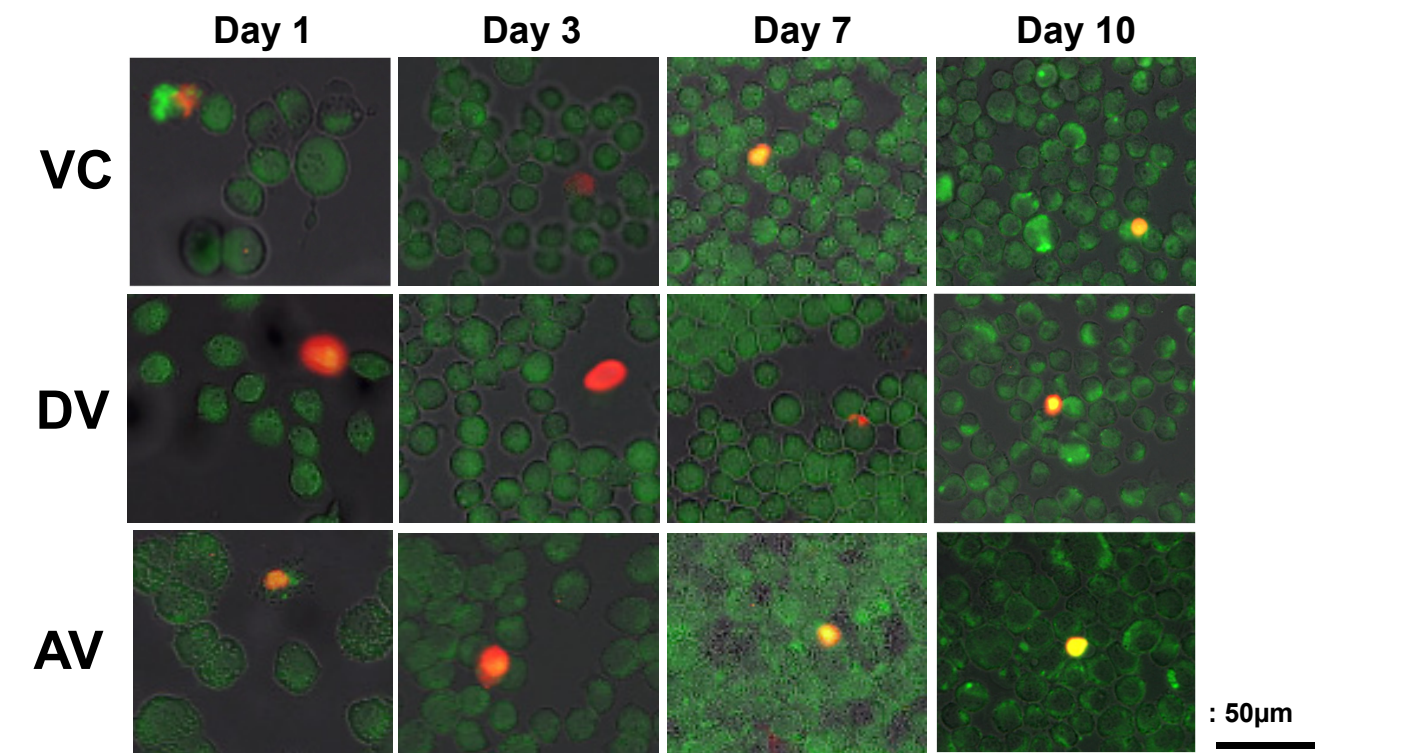

Supplement: s1 [file s1]
